# Supplementary material
Source: publisher figshare collection journal article supplement (https://sage.figshare.com/ndownloader/files/15326726)
Supplement: Supplementary file 1 [file 15326726]

Supplemental Table 1. Univariate associations between the outcome of BMI Z-score and given covariates.

| <b>Covariate</b>       | <b>Estimate from Univariate Model</b> | <b>95% CI</b>   | <b>p-value</b> |
|------------------------|---------------------------------------|-----------------|----------------|
| Internal T-score       | -0.006                                | (-0.022,0.011)  | 0.507          |
| External T-score       | 0.004                                 | (-0.013,0.022)  | 0.625          |
| Sleep Problems T-score | -0.008                                | (-0.033,0.017)  | 0.526          |
| ISCI T-score           | -0.001                                | (-0.020,0.018)  | 0.913          |
| FI T-score             | -0.003                                | (-0.022,0.017)  | 0.798          |
| EMI T-score            | -0.006                                | (-0.024,0.012)  | 0.508          |
| Food Approach          | 0.390                                 | (0.061,0.719)   | 0.021          |
| Food Avoid             | -0.536                                | (-0.871,-0.201) | 0.002          |

Note: Each row represents a separate test of BMI Z-score ~ covariate. Only Food Approach and Food Avoid have  $p < 0.05$  without any corrections taken for multiple testing.

Supplemental Table 2. Univariate associations between the outcome of obese/overweight vs. normal weight (obese/overweight=1) and given covariates.

| <b>Covariate</b>       | <b>OR from Univariate Model</b> | <b>95% CI</b> | <b>p-value</b> |
|------------------------|---------------------------------|---------------|----------------|
| Internal T-score       | 0.990                           | (0.952,1.028) | 0.598          |
| External T-score       | 0.985                           | (0.944,1.027) | 0.491          |
| Sleep Problems T-score | 0.972                           | (0.901,1.033) | 0.412          |
| ISCI T-score           | 0.983                           | (0.934,1.029) | 0.483          |
| FI T-score             | 0.982                           | (0.930,1.029) | 0.476          |
| EMI T-score            | 0.986                           | (0.940,1.028) | 0.517          |
| Food Approach          | 3.408                           | (1.509,8.230) | 0.004          |
| Food Avoid             | 0.391                           | (0.154,0.923) | 0.039          |

Note: Each row represents a separate test of (obese/overweight) ~ covariate. Only Food Approach and Food Avoid have  $p < 0.05$  without any corrections taken for multiple testing.
